# Supplementary material
Source: Springer Nature journal article supplement (https://www.springermedizin.de/resource/supplementary/13014_2011_462_MOESM4_ESM.pdf/9633482)

A

B

C

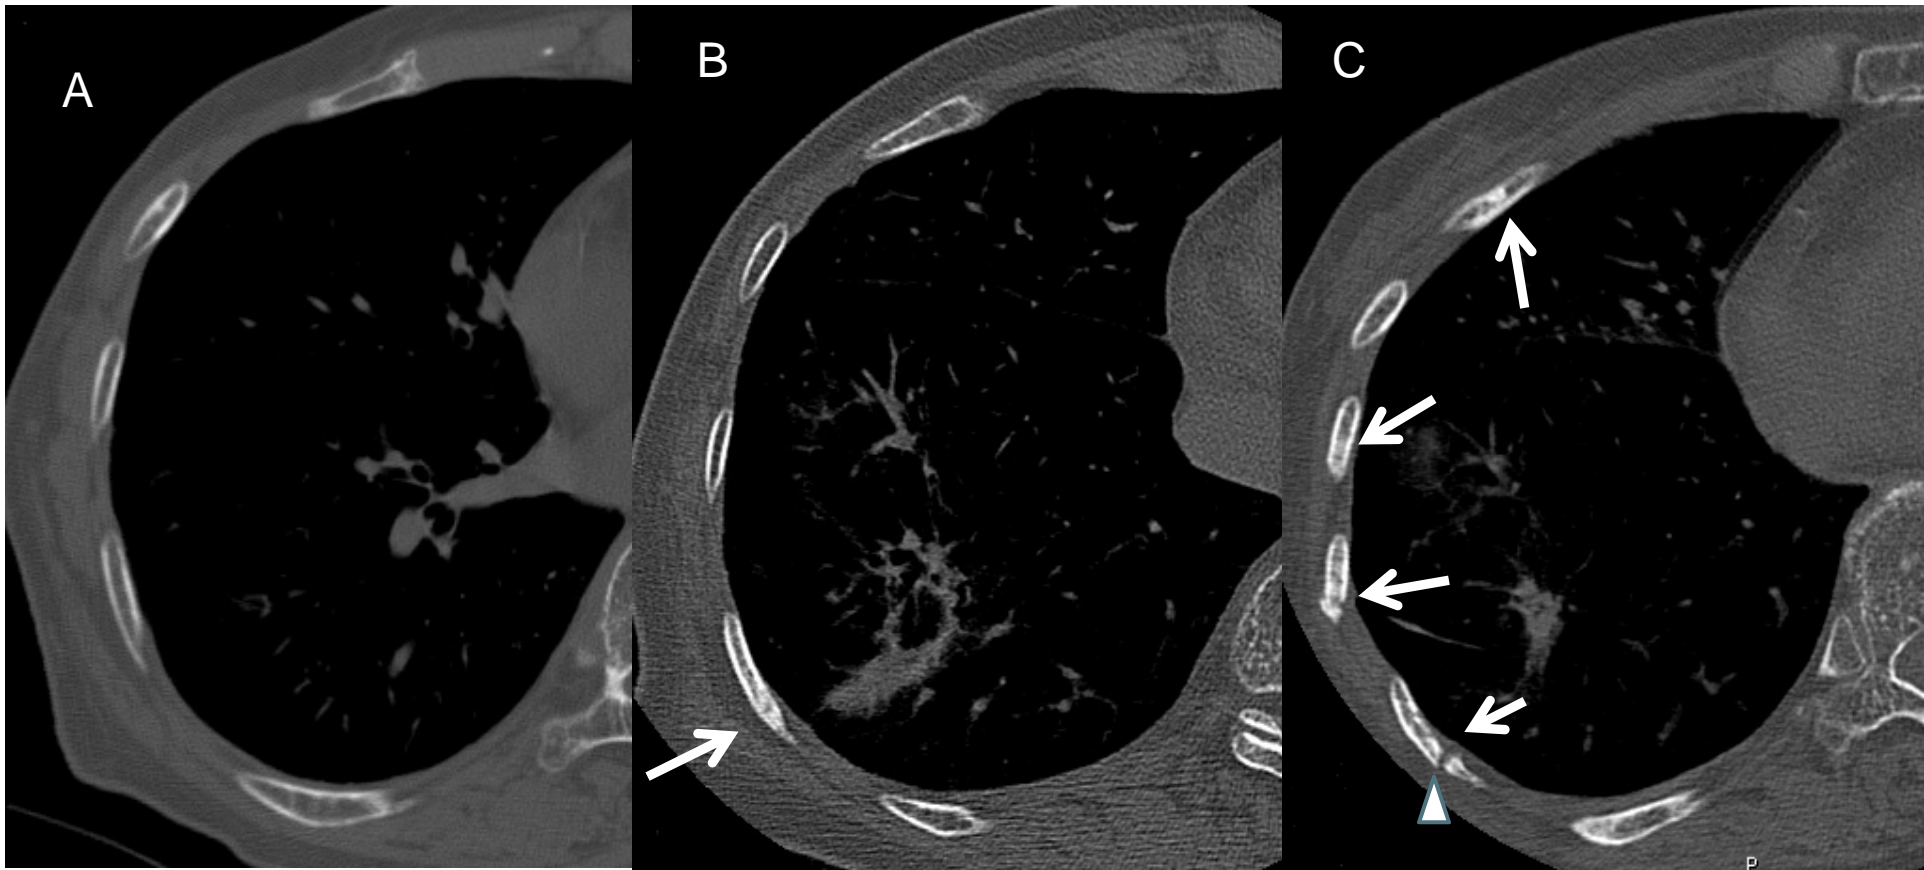

Supplement: MOESM4 [file 9633482]
